# Supplementary material for: Quality assessment and comparative analysis on the recommendations of current guidelines on the management of peripheral arterial disease: a systematic review protocol
Source: HighWire-hosted journal article supplement (doi:10.1136/bmjopen-2020-047980), 2021-09-01
Supplement: bmjopen-2020-047980supp002_data_supplement.pdf [file bmjopen-2020-047980supp002_data_supplement.pdf]

**AGREE-II Data sheet for Appraisers**

| Guideline | Guideline | Domain 1 | Domain 2 | Domain 3 | Domain 4 | Domain 5 | Domain 6 | Overall score |
|-----------|-----------|----------|----------|----------|----------|----------|----------|---------------|
| 1         |           |          |          |          |          |          |          |               |
| 2         |           |          |          |          |          |          |          |               |
| 3         |           |          |          |          |          |          |          |               |
| 4         |           |          |          |          |          |          |          |               |
| 5         |           |          |          |          |          |          |          |               |
| 6         |           |          |          |          |          |          |          |               |
| 7         |           |          |          |          |          |          |          |               |
| 8         |           |          |          |          |          |          |          |               |
| 9         |           |          |          |          |          |          |          |               |
| 10        |           |          |          |          |          |          |          |               |

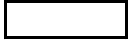

## AGREE-II Cumulative scores sheet

| Guideline Serial Number | Guideline name | Cumulative score for Domain 1 | Cumulative score for Domain 2 | Cumulative score for Domain 3 | Cumulative score for Domain 4 | Cumulative score for Domain 5 | Cumulative score for Domain 6 | Cumulative Overall score | Recommendation |
|-------------------------|----------------|-------------------------------|-------------------------------|-------------------------------|-------------------------------|-------------------------------|-------------------------------|--------------------------|----------------|
| 1                       |                |                               |                               |                               |                               |                               |                               |                          |                |
| 2                       |                |                               |                               |                               |                               |                               |                               |                          |                |
| 3                       |                |                               |                               |                               |                               |                               |                               |                          |                |
| 4                       |                |                               |                               |                               |                               |                               |                               |                          |                |
| 5                       |                |                               |                               |                               |                               |                               |                               |                          |                |
| 6                       |                |                               |                               |                               |                               |                               |                               |                          |                |
| 7                       |                |                               |                               |                               |                               |                               |                               |                          |                |
| 8                       |                |                               |                               |                               |                               |                               |                               |                          |                |
| 9                       |                |                               |                               |                               |                               |                               |                               |                          |                |
| 10                      |                |                               |                               |                               |                               |                               |                               |                          |                |
