# Supplementary material for: Quality assessment and comparative analysis on the recommendations of current guidelines on the management of peripheral arterial disease: a systematic review protocol
Source: HighWire-hosted journal article supplement (doi:10.1136/bmjopen-2020-047980), 2021-09-01
Supplement: bmjopen-2020-047980supp003_data_supplement.pdf [file bmjopen-2020-047980supp003_data_supplement.pdf]

**Guidelin Guidelin Organization/Soc Year of ı Funding Country Target U Guidelin Evidence**

- 1
- 2
- 3
- 4
- 5
- 6
- 7
- 8
- 9
- 10

## Recommendations for screening

| Recommendation 1                          | Recommendation 2                          | Recommendation 3                          | Recommendation 4                          |
|-------------------------------------------|-------------------------------------------|-------------------------------------------|-------------------------------------------|
| Recommendation level of evidence Strength |

## Recommendations for Diagnosis

## Recomm

| Recommendation 1  | Recommendation 2  | Recommendation 3  | Recommendation 4  |
|-------------------|-------------------|-------------------|-------------------|
| level of evidence | level of evidence | level of evidence | level of evidence |

## Recommendations for Pharmacological Treatment

## Recommendation

Recommendation 1

Recommendation 2

Recommendation 3

Recommendation 1

Strength (Recommendation level of evidence) Strength (Recommendation level of evidence) Strength (Recommendation level of evidence) Strength (Recommendation level of evidence)

## ns for Non- Pharmacological Treatment

### Recommendation 2

### Recommendation 3

Recommen level of ev Strenght ( Recommendation level of ev Strenght of recommendation
